# Supplementary material
Source: PubMed Central journal article supplement (PMC10012040)
Supplement: jamaneurol-e230183-s001.pdf [file jamaneurol-e230183-s001.pdf]

## Supplemental Online Content

Zheng Z, Lv J, Rong S, Sun T, Chen L. Physical frailty, genetic predisposition, and incident parkinson disease. *JAMA Neurol*. Published online March 13, 2023.  
doi:10.1001/jamaneurol.2023.0183

**eTable 1.** Disease Definitions in UK Biobank Study

**eTable 2.** Frailty Definition and Cut-off Points in UK Biobank Study

**eTable 3.** Information of 44 SNPs for PD in UK Biobank

**eTable 4.** Association Between PD-PRS and Incident PD

**eTable 5.** Definition and List of Long-term Morbidities

**eTable 6.** Risk of Incident PD According to Genetic Risk and Frailty Phenotype

**eTable 7.** Stratified Analysis for the Association Between Physical Frailty and Incidence of PD

**eTable 8.** Association of Frailty and PD Using Fine & Gray Models for Competing Risk

**eFigure 1.** Flow Chart

**eFigure 2.** The Curve of Density Distribution and Weighted Polygenic Risk Score

**eFigure 3.** The Accumulation of Frailty Phenotype Components and Risk of PD

This supplemental material has been provided by the authors to give readers additional information about their work.

**eTable 1. Disease Definitions in UK Biobank Study**

|                     | <b>ICD-9</b>                                                  | <b>ICD-10</b>                                                                                                                                                                                                        | <b>Self-reported fields</b> |
|---------------------|---------------------------------------------------------------|----------------------------------------------------------------------------------------------------------------------------------------------------------------------------------------------------------------------|-----------------------------|
| Parkinson's Disease | 332.0, 332.1, 333.0                                           | G20, G21, G21.0, G21.1, G21.2, G21.3, G21.4, G21.8, G21.9, G22, G23.0, G23.1, G23.2, G23.3, G23.8, G23.9, G25.9, G26, G90.3                                                                                          | 20002<br>(1262)             |
| Dementia            | 290.2, 290.3, 290.4, 291.2, 294.1, 331.0, 331.1, 331.2, 331.5 | A81.0, F00, F00.0, F00.1, F00.2, F00.9, F01, F01.0, F01.1, F01.2, F01.3, F01.8, F01.9, F02, F02.0, F02.1, F02.2, F02.3, F02.4, F02.8, F03, F05.1, F10.6, G30, G30.0, G30.1, G30.8, G30.9, G31.0, G31.1, G31.8, I67.3 | 20002<br>(1263)             |

Variable definitions constructed using ICD-9, ICD-10 codes, and self-reported data fields with choice-, disease- or procedure-specific codes between brackets are shown.

Abbreviations: ICD, International Classification of Diseases.

**eTable 2. Frailty Definition and Cut-off Points in UK Biobank Study**

| Individuals components | Criteria                                                                                                                                                                                                                                                                                                                                                                                                                                                                                                                                                          | Field IDs                      |
|------------------------|-------------------------------------------------------------------------------------------------------------------------------------------------------------------------------------------------------------------------------------------------------------------------------------------------------------------------------------------------------------------------------------------------------------------------------------------------------------------------------------------------------------------------------------------------------------------|--------------------------------|
| Weight loss            | Self-reported: "Compared with one year ago, has your weight changed?"<br>Response: yes, lost weight = 1; other = 0;<br>Do not know/Prefer not to answer = missing data.                                                                                                                                                                                                                                                                                                                                                                                           | 2306                           |
| Exhaustion             | Self-reported: "Over the past two weeks, how often have you felt tired or had little energy?"<br>Response: more than half the days or nearly every day = 1; other = 0;<br>Do not know/Prefer not to answer = missing data.                                                                                                                                                                                                                                                                                                                                        | 2080                           |
| Low physical activity  | Quintiles of sex- and age-specific levels of total MET minutes per week derived from IPAQ.<br>The lowest 20% of total MET minutes per week = 1; other = 0;<br>No response/ Prefer not to answer = missing data.                                                                                                                                                                                                                                                                                                                                                   | 31, 21022, 22037, 22038, 22039 |
| Slow gait speed        | Self-reported: "How would you describe your usual walking pace?"<br>Response: slow = 1; other = 0;<br>Do not know/Prefer not to answer = missing data.                                                                                                                                                                                                                                                                                                                                                                                                            | 924                            |
| Low grip strength      | Measured grip strength expressed in kg by sex- and BMI- adjusted cut-off points.<br>Cut-off points:<br><u>Men</u><br>If BMI $\leq 24.0$ kg/m <sup>2</sup> & grip strength $\leq 29$ kg<br>If BMI 24.1 to 26.0 kg/m <sup>2</sup> & grip strength $\leq 30$ kg<br>If BMI 26.1 to 28.0 kg/m <sup>2</sup> & grip strength $\leq 30$ kg<br>If BMI $> 28.0$ kg/m <sup>2</sup> & grip strength $\leq 32$ kg<br><u>Women</u><br>If BMI $\leq 23.0$ kg/m <sup>2</sup> & grip strength $\leq 17$ kg<br>If BMI 23.1 to 26.0 kg/m <sup>2</sup> & grip strength $\leq 17.3$ kg | 31, 21001, 46, 47              |

|  |                                                                                                                                                                                           |  |
|--|-------------------------------------------------------------------------------------------------------------------------------------------------------------------------------------------|--|
|  | If BMI 26.1 to 29.0 kg/m <sup>2</sup> & grip strength ≤18 kg<br>If BMI >29.0 kg/m <sup>2</sup> & grip strength ≤21 kg<br>If data on BMI or grip strength is not available = missing data. |  |
|--|-------------------------------------------------------------------------------------------------------------------------------------------------------------------------------------------|--|

Abbreviations: BMI, body mass index; MET, metabolic equivalent of energy; IPAQ, International Physical Activity Questionnaire.

**eTable 3. Information of 44 SNPs for PD in UK Biobank**

| SNP         | Effect allele/<br>alternate allele | EAF in 1000<br>Genomes | P-value                | OR   |
|-------------|------------------------------------|------------------------|------------------------|------|
| rs10797576  | T/C                                | 0.137                  | 1.76×10 <sup>-10</sup> | 1.13 |
| rs10906923  | C/A                                | 0.306                  | 2.37×10 <sup>-8</sup>  | 0.93 |
| rs11060180  | G/A                                | 0.45                   | 3.08×10 <sup>-11</sup> | 0.91 |
| rs11158026  | T/C                                | 0.307                  | 2.88×10 <sup>-10</sup> | 0.91 |
| rs11343     | T/G                                | 0.454                  | 1.46×10 <sup>-9</sup>  | 1.07 |
| rs115185635 | C/G                                | 0.036                  | 2.2×10 <sup>-8</sup>   | 1.79 |
| rs11724635  | C/A                                | 0.437                  | 4.26×10 <sup>-17</sup> | 0.89 |
| rs117896735 | A/G                                | 0.012                  | 1.21×10 <sup>-11</sup> | 1.77 |
| rs12456492  | G/A                                | 0.332                  | 2.15×10 <sup>-11</sup> | 1.10 |
| rs12497850  | G/T                                | 0.347                  | 6.8×10 <sup>-8</sup>   | 0.93 |
| rs12637471  | A/G                                | 0.219                  | 5.38×10 <sup>-22</sup> | 0.84 |
| rs13294100  | T/G                                | 0.371                  | 1.99×10 <sup>-12</sup> | 0.91 |
| rs14235     | A/G                                | 0.397                  | 3.63×10 <sup>-12</sup> | 1.10 |
| rs143918452 | G/A                                | 0.996                  | 2.25×10 <sup>-7</sup>  | 0.68 |
| rs1474055   | C/T                                | 0.881                  | 7.11×10 <sup>-16</sup> | 0.82 |
| rs1555399   | T/A                                | 0.544                  | 5.7×10 <sup>-16</sup>  | 1.15 |
| rs17649553  | T/C                                | 0.232                  | 6.11×10 <sup>-49</sup> | 0.77 |
| rs199347    | G/A                                | 0.368                  | 5.62×10 <sup>-14</sup> | 0.9  |
| rs2280104   | T/C                                | 0.367                  | 9.06×10 <sup>-7</sup>  | 1.06 |
| rs2414739   | G/A                                | 0.292                  | 3.59×10 <sup>-12</sup> | 0.9  |
| rs2694528   | C/A                                | 0.115                  | 1.69×10 <sup>-11</sup> | 1.15 |
| rs2740594   | A/G                                | 0.753                  | 9.54×10 <sup>-11</sup> | 1.10 |
| rs329648    | T/C                                | 0.327                  | 8.05×10 <sup>-12</sup> | 1.11 |
| rs34043159  | C/T                                | 0.352                  | 3.83×10 <sup>-8</sup>  | 1.07 |
| rs34311866  | C/T                                | 0.199                  | 6×10 <sup>-41</sup>    | 1.26 |
| rs353116    | T/C                                | 0.385                  | 9.73×10 <sup>-7</sup>  | 0.94 |
| rs356182    | G/A                                | 0.375                  | 1.85×10 <sup>-82</sup> | 1.34 |
| rs35749011  | G/A                                | 0.976                  | 6.1×10 <sup>-23</sup>  | 0.57 |
| rs3793947   | A/G                                | 0.463                  | 2.59×10 <sup>-8</sup>  | 0.91 |
| rs4073221   | G/T                                | 0.132                  | 3.02×10 <sup>-9</sup>  | 1.11 |
| rs4653767   | C/T                                | 0.315                  | 2.4×10 <sup>-10</sup>  | 0.92 |
| rs4784227   | T/C                                | 0.265                  | 8.29×10 <sup>-8</sup>  | 1.08 |
| rs591323    | A/G                                | 0.293                  | 3.17×10 <sup>-8</sup>  | 0.91 |
| rs601999    | C/T                                | 0.699                  | 8.03×10 <sup>-9</sup>  | 0.93 |
| rs62120679  | T/C                                | 0.324                  | 2.52×10 <sup>-9</sup>  | 1.14 |
| rs6430538   | T/C                                | 0.488                  | 3.35×10 <sup>-19</sup> | 0.88 |
| rs6812193   | T/C                                | 0.398                  | 1.85×10 <sup>-11</sup> | 0.91 |
| rs76904798  | T/C                                | 0.132                  | 4.86×10 <sup>-14</sup> | 1.16 |

|            |     |       |                        |      |
|------------|-----|-------|------------------------|------|
| rs78738012 | C/T | 0.106 | $2.11 \times 10^{-9}$  | 1.14 |
| rs8005172  | T/C | 0.424 | $1.2 \times 10^{-9}$   | 1.08 |
| rs8118008  | A/G | 0.596 | $2.32 \times 10^{-8}$  | 1.11 |
| rs823118   | C/T | 0.467 | $1.96 \times 10^{-16}$ | 0.89 |
| rs9275326  | T/C | 0.114 | $5.81 \times 10^{-13}$ | 0.80 |
| rs9468199  | A/G | 0.172 | $3.44 \times 10^{-13}$ | 1.12 |

Abbreviations: EAF, effect allele frequency; SNP, single nucleotide polymorphism; OR, odds ratio.

**eTable 4. Association between PD-PRS and Incident PD**

|                                         | <b>Low PRS</b>   | <b>Intermediate PRS</b> | <b>High PRS</b>  |
|-----------------------------------------|------------------|-------------------------|------------------|
| Case/person-years                       | 486/1286269      | 591/1287125             | 839/1287027      |
| Incident cases per 100,000 person-years | 37.8             | 45.9                    | 65.2             |
| Hazard ratio (95% CI)*                  | 1.00 (reference) | 1.22 (1.08-1.37)        | 1.72 (1.54-1.93) |

\*Model adjusted for genotyping array and the first 10 principal components of ancestry.

Abbreviations: CI: confidence interval; PRS, polygenic risk score.

**eTable 5. Definition and List of Long-Term Morbidities**

|    | Morbidity grouping*         | Conditions included                        | Code |
|----|-----------------------------|--------------------------------------------|------|
| 1  | Hypertension                | Hypertension                               | 1065 |
|    |                             | Essential hypertension                     | 1072 |
| 2  | Coronary heart disease      | Heart attack/MI                            | 1075 |
|    |                             | Angina                                     | 1074 |
| 3  | Diabetes                    | Diabetic nephropathy                       | 1607 |
|    |                             | Diabetic neuropathy/ulcers                 | 1468 |
|    |                             | Diabetes                                   | 1220 |
|    |                             | Type 1 diabetes                            | 1222 |
|    |                             | Type 2 diabetes                            | 1223 |
|    |                             | Diabetic eye disease                       | 1276 |
| 4  | Stroke/TIA                  | Stroke                                     | 1081 |
|    |                             | TIA                                        | 1082 |
|    |                             | Subarachnoid haemorrhage                   | 1086 |
|    |                             | Brain haemorrhage                          | 1491 |
|    |                             | Ischaemic stroke                           | 1583 |
| 5  | Atrial fibrillation         | Atrial fibrillation                        | 1471 |
| 6  | Heart failure               | Cardiomyopathy                             | 1079 |
|    |                             | Hypertrophic cardiomyopathy                | 1588 |
|    |                             | Heart failure/pulmonary oedema             | 1076 |
| 7  | Peripheral vascular disease | Peripheral vascular disease                | 1067 |
|    |                             | Leg claudication/intermittent claudication | 1087 |
| 8  | COPD                        | COPD/Chronic obstructive pulmonary disease | 1112 |
|    |                             | Emphysema/Chronic bronchitis               | 1113 |
|    |                             | Emphysema                                  | 1472 |
| 9  | Asthma                      | Asthma                                     | 1111 |
| 10 | Bronchiectasis              | Bronchiectasis                             | 1114 |
| 11 | Cancer*                     | “yes”/“no” to “have you ever had cancer?”  |      |
| 12 | Dyspepsia                   | Gastro-oesophageal reflux (GORD)           | 1138 |
|    |                             | Oesophagitis/Barrett’s oesophagus          | 1139 |
|    |                             | Gastric stomach ulcers                     | 1142 |
|    |                             | Gastric erosions/gastritis                 | 1143 |
|    |                             | Duodenal ulcer                             | 1457 |
|    |                             | Dyspepsia/indigestion                      | 1510 |
|    |                             | Hiatus hernia                              | 1474 |
|    |                             | Helicobacter pylori                        | 1442 |
| 13 | Diverticular disease        | Diverticular disease/diverticulitis        | 1458 |



|    |                                          |                                   |      |
|----|------------------------------------------|-----------------------------------|------|
| 14 | Irritable bowel syndrome                 | Irritable bowel syndrome          | 1154 |
| 15 | Chronic liver disease                    | Oesophageal varices               | 1141 |
|    |                                          | Non infective hepatitis           | 1157 |
|    |                                          | Liver failure/cirrhosis           | 1158 |
|    |                                          | Primary biliary cirrhosis         | 1506 |
| 16 | Inflammatory bowel disease               | Inflammatory bowel disease        | 1461 |
|    |                                          | Crohn's disease                   | 1462 |
|    |                                          | Ulcerative colitis                | 1463 |
| 17 | Constipation                             | Constipation                      | 1599 |
| 18 | Viral hepatitis                          | Hepatitis B                       | 1579 |
|    |                                          | Hepatitis C                       | 1580 |
|    |                                          | Hepatitis D                       | 1581 |
| 19 | Depression                               | Depression                        | 1286 |
|    |                                          | Postnatal depression              | 1531 |
| 20 | Anxiety                                  | Anxiety/panic attacks             | 1287 |
|    |                                          | Nervous breakdown                 | 1288 |
|    |                                          | Post-traumatic stress disorder    | 1469 |
|    |                                          | Obsessive compulsive disorder     | 1615 |
|    |                                          | Stress                            | 1614 |
|    |                                          | Insomnia                          | 1616 |
|    |                                          | Psychological/psychiatric problem | 1243 |
| 21 | Schizophrenia/Bipolar affective disorder | Scizophrenia                      | 1289 |
|    | Bipolar                                  | Mania                             | 1291 |
|    |                                          | Bipolar disorder                  | 1291 |
|    |                                          | Manic depression                  | 1291 |
| 22 | Connective tissue diseases               | Myositis/myopathy                 | 1322 |
|    |                                          | Systemic lupus erythematosus/SLE  | 1381 |
|    |                                          | Connective tissue disorder        | 1373 |
|    |                                          | Sjogren's syndrome.sicca syndrome | 1382 |
|    |                                          | Dermatopolymyositis               | 1383 |
|    |                                          | Scleroderma/systemic sclerosis    | 1384 |
|    |                                          | Rheumatoid arthritis              | 1464 |
|    |                                          | Psoriatic arthropathy             | 1477 |
|    |                                          | Dermatomyositis                   | 1480 |
|    |                                          | Polymyositis                      | 1481 |
|    |                                          | Polymyalgia rheumatica            | 1377 |
| 23 | Painful conditions                       | Back pain                         | 1534 |

|    |                        |                                             |      |
|----|------------------------|---------------------------------------------|------|
|    |                        | Joint pain                                  | 1537 |
|    |                        | Headaches (not migraine)                    | 1436 |
|    |                        | Sciatica                                    | 1476 |
|    |                        | Plantar fasciitis                           | 1540 |
|    |                        | Carpal tunnel syndrome                      | 1541 |
|    |                        | Fibromyalgia                                | 1542 |
|    |                        | Arthritis                                   | 1538 |
|    |                        | Shingles                                    | 1573 |
|    |                        | Disc problem                                | 1532 |
|    |                        | Prolapsed disc/slipped disc                 | 1312 |
|    |                        | Spine arthritis/spondylitis                 | 1311 |
|    |                        | Ankylosing spondylitis                      | 1313 |
|    |                        | Back problem                                | 1294 |
|    |                        | Osteoarthritis                              | 1465 |
|    |                        | Gout                                        | 1466 |
|    |                        | Cervical spondylosis                        | 1478 |
|    |                        | Trigeminal neuralgia                        | 1523 |
|    |                        | Disc degeneration                           | 1533 |
|    |                        | Trapped nerve/compressed nerve              | 1257 |
| 24 | Osteoporosis           | Osteoporosis                                | 1309 |
| 25 | Thyroid disorders      | Thyroid problem (not cancer)                | 1224 |
|    |                        | Hyperthyroidism/thyrotoxicosis              | 1225 |
|    |                        | Hypothyroidism/myxoedema                    | 1226 |
|    |                        | Grave's disease                             | 1522 |
|    |                        | Thyroid goitre                              | 1610 |
|    |                        | Thyroiditis                                 | 1428 |
| 26 | Alcohol problems       | Alcohol dependency                          | 1408 |
|    |                        | Alcoholic liver disease/alcoholic cirrhosis | 1604 |
| 27 | Chronic kidney disease | Polycystic kidney                           | 1427 |
|    |                        | Diabetic nephropathy                        | 1607 |
|    |                        | Renal/kidney failure                        | 1192 |
|    |                        | Renal failure requiring dialysis            | 1193 |
|    |                        | Renal failure not requiring dialysis        | 1194 |
|    |                        | Kidney nephropathy                          | 1519 |
|    |                        | Immunoglobulin A (IgA) nephropathy          | 1520 |
| 28 | Prostate disorders     | Prostate problem (not cancer)               | 1207 |
|    |                        | Enlarged prostate                           | 1396 |
|    |                        | Benign prostatic hypertrophy                | 1516 |

|    |                          |                                         |      |
|----|--------------------------|-----------------------------------------|------|
| 29 | Glaucoma                 | Glaucoma                                | 1277 |
| 30 | Epilepsy                 | Epilepsy                                | 1264 |
| 31 | Dementia                 | Dementia/Alzheimer/cognitive impairment | 1263 |
| 32 | Psoriasis or eczema      | Eczema/dermatitis                       | 1452 |
|    |                          | Psoriasis                               | 1453 |
| 33 | Migraine                 | Migraine                                | 1265 |
| 34 | Chronic sinusitis        | Chronic sinusitis                       | 1416 |
| 35 | Anorexia or bulimia      | Anorexia, bulimia/other eating disorder | 1470 |
| 36 | Parkinson's disease      | Parkinson's disease                     | 1262 |
| 37 | Multiple sclerosis       | Multiple sclerosis                      | 1261 |
| 38 | Chronic fatigue syndrome | Chronic fatigue syndrome                | 1482 |
| 39 | Endometriosis            | Endometriosis                           | 1402 |
| 40 | Meniere disease          | Meniere disease                         | 1421 |
| 41 | Pernicious anaemia       | Pernicious anaemia                      | 1331 |
| 42 | Polycystic ovaries       | Polycystic ovaries                      | 1350 |

\*Self-report lifetime diagnosis by doctor recorded by nurse-led interview (UK Biobank data field ID: 20002), except cancer diagnosis which was reported by touch-screen questionnaire. The list of disease groupings was based on Barnett et al (2012). In the present study, we did not include patients with Parkinson's disease (code 1262) and dementia (code 1263) at baseline.

**eTable 6. Risk of incident PD according to genetic risk and frailty phenotype**

|             | Low PRS          | Intermediate PRS | High PRS         |
|-------------|------------------|------------------|------------------|
| Non-frailty | 1.00 (reference) | 1.25 (1.04-1.51) | 2.04 (1.72-2.41) |
| Pre-frailty | 1.45 (1.20-1.75) | 1.75 (1.46-2.09) | 2.21 (1.86-2.63) |
| Frailty     | 2.25 (1.56-3.25) | 2.55 (1.81-3.59) | 3.22 (2.35-4.41) |

Model adjusted for age, sex, Townsend deprivation index, assessment centers, alcohol consumption, smoking status, BMI, the number of long-term morbidities, genotyping array, and the first 10 principal components of ancestry.

**eTable 7. Stratified Analysis for the Association between Physical Frailty and Incidence of PD**

|                                           | N      | Non-frailty | Pre-frailty      | Frailty          | P for interaction |
|-------------------------------------------|--------|-------------|------------------|------------------|-------------------|
| <b>Age</b>                                |        |             |                  |                  |                   |
| <60 years                                 | 185860 | 1 (ref.)    | 1.37 (1.13-1.67) | 2.11 (1.38-3.21) | 0.07              |
| ≥60 years                                 | 129138 | 1 (ref.)    | 1.25 (1.12-1.39) | 1.86 (1.48-2.33) |                   |
| <b>Sex</b>                                |        |             |                  |                  |                   |
| Male                                      | 154739 | 1 (ref.)    | 1.32 (1.18-1.48) | 2.03 (1.58-2.60) | 0.24              |
| Female                                    | 160259 | 1 (ref.)    | 1.14 (0.96-1.36) | 1.60 (1.15-2.23) |                   |
| <b>Townsend deprivation index</b>         |        |             |                  |                  |                   |
| Above median value (high deprivation)     | 157489 | 1 (ref.)    | 1.35 (1.18-1.55) | 1.95 (1.51-2.52) | 0.10              |
| Below median value (low deprivation)      | 157509 | 1 (ref.)    | 1.18 (1.03-1.35) | 1.76 (1.27-2.44) |                   |
| <b>The number of long-term conditions</b> |        |             |                  |                  |                   |
| None                                      | 111690 | 1 (ref.)    | 1.14 (0.94-1.39) | 0.55 (0.14-2.22) | 0.02              |
| One                                       | 105031 | 1 (ref.)    | 1.26 (1.07-1.50) | 1.82 (1.11-3.00) |                   |
| Two or more                               | 113196 | 1 (ref.)    | 1.37 (1.18-1.58) | 2.24 (1.78-2.81) |                   |

Model adjusted for age (continuous) and sex (male, female), Townsend deprivation index (in quintiles), assessment centers (22 categories), alcohol consumption (daily or most daily, 3 or 4 times a week, 1 or 2 times a week, 1 to 3 times a week, or never or special occasions only), smoking status (never, former, or current), BMI (continuous), the number of long-term morbidities (0, 1, 2, 3, 4, or ≥5), PD-PRS, genotyping array, and the first 10 principal components of ancestry.

**eTable 8. Association of Frailty and PD Using Fine & Gray Models for Competing Risk**

| <b>Frailty phenotypes</b> | <b>Non-frailty</b> | <b>Pre-frailty</b> | <b>Frailty</b>   | <b>Per score increment</b> |
|---------------------------|--------------------|--------------------|------------------|----------------------------|
| Hazard ratio (95% CI)     | 1.00 (ref.)        | 1.24 (1.13-1.37)   | 1.73 (1.42-2.11) | 1.18 (1.12-1.24)           |

Model adjusted for age (continuous) and sex (male, female), Townsend deprivation index (in quintiles), assessment centers (22 categories), alcohol consumption (daily or most daily, 3 or 4 times a week, 1 or 2 times a week, 1 to 3 times a week, or never or special occasions only), smoking status (never, former, or current), BMI (continuous), the number of long-term morbidities (0, 1, 2, 3, 4, or  $\geq 5$ ), PD-PRS, genotyping array, and the first 10 principal components of ancestry.

**eFigure 1. Flow Chart**

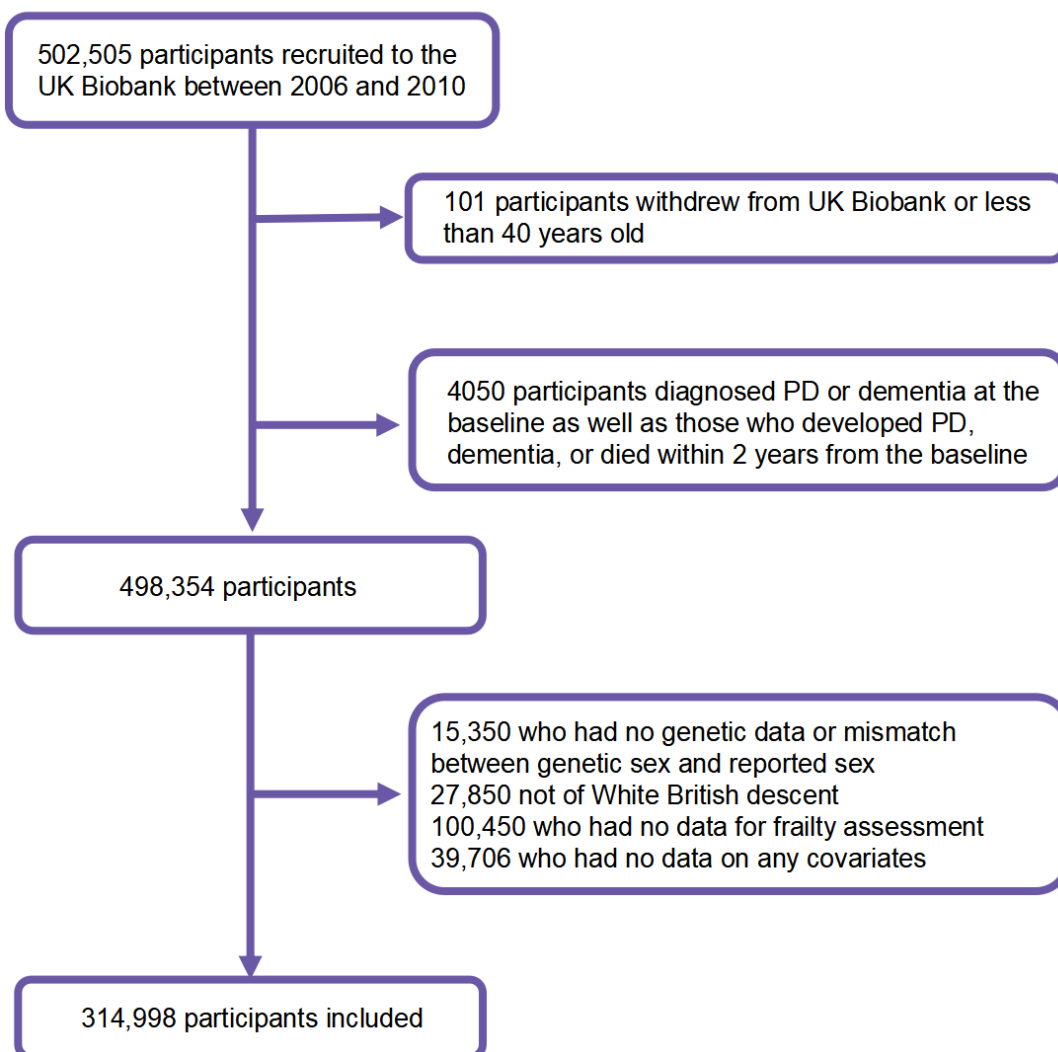

**eFigure 2. The Curve of Density Distribution and Weighted Polygenic Risk Score**

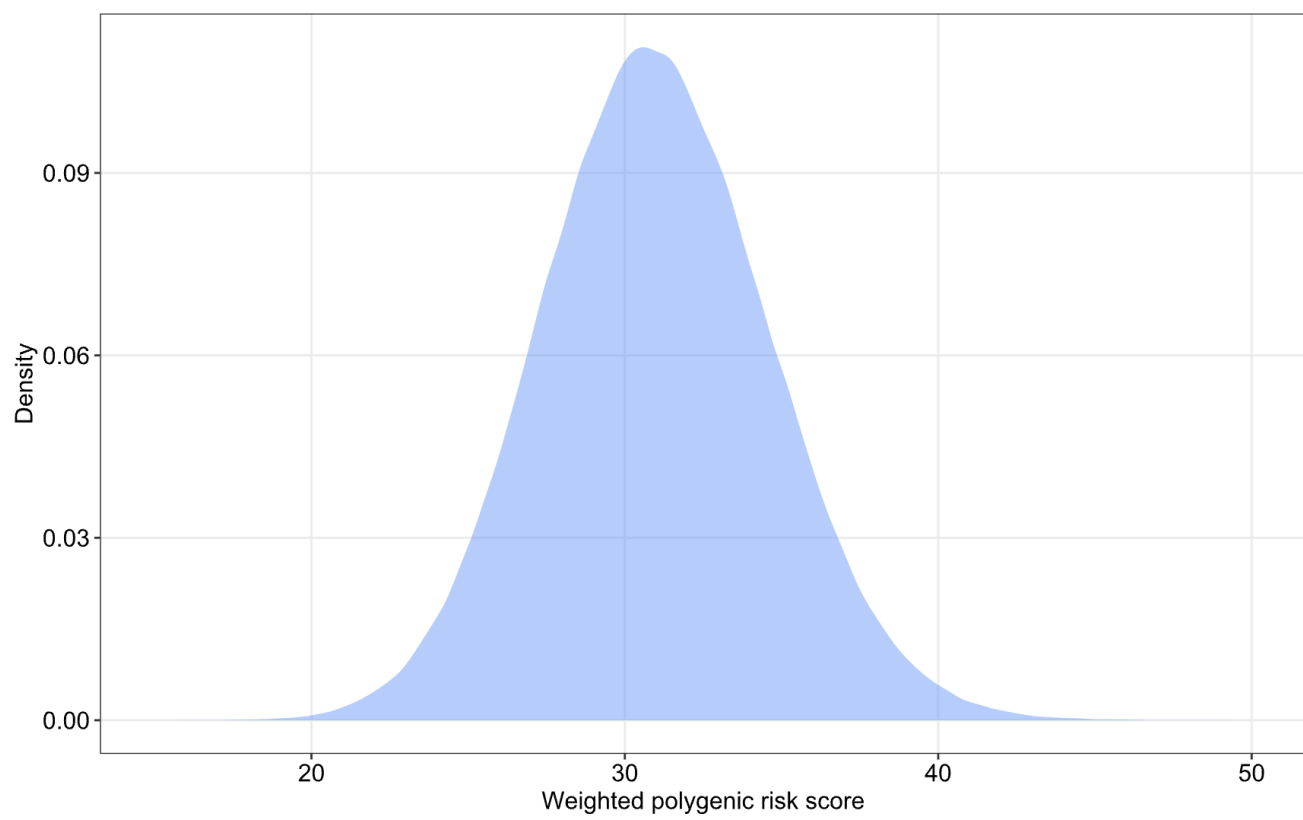



**eFigure 3. The Accumulation of Frailty Phenotype Components and Risk of PD**

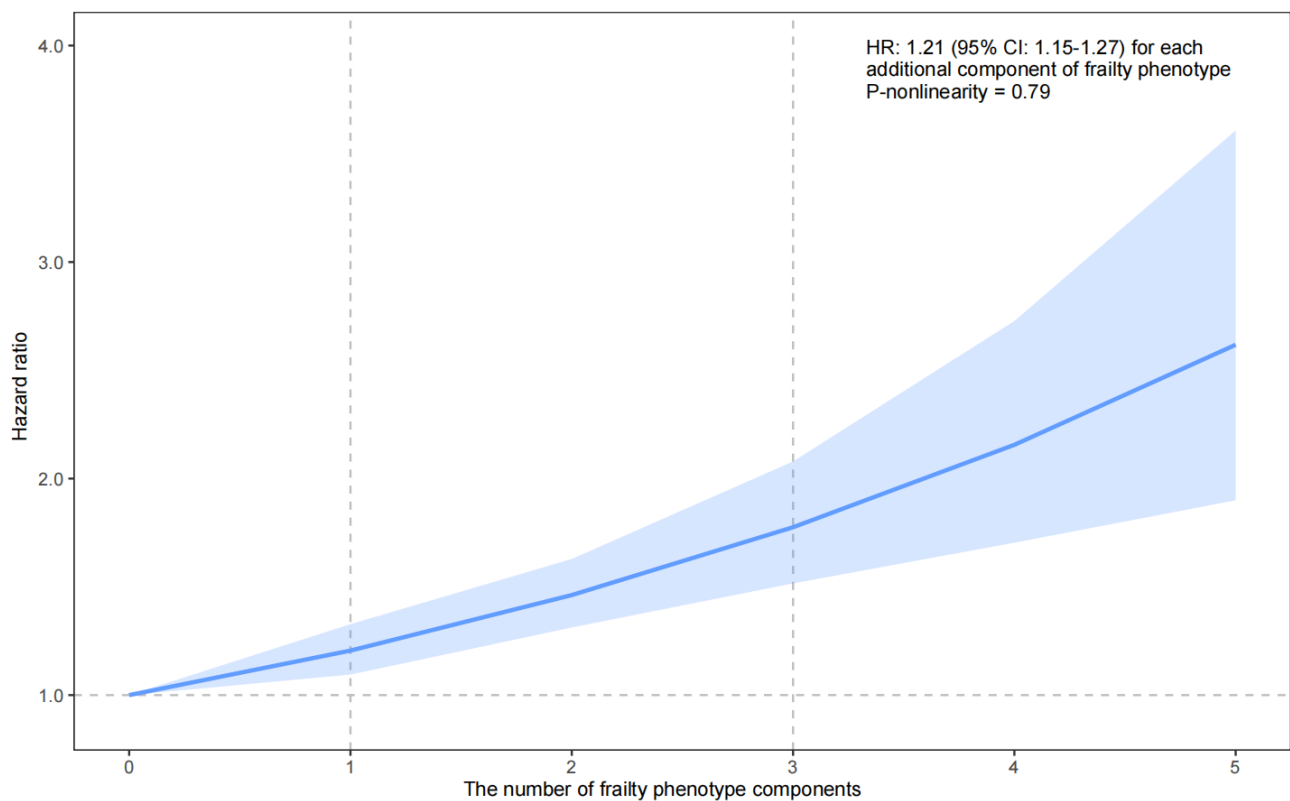

Model adjusted for age (continuous) and sex (male, female), Townsend deprivation index (in quintiles), assessment centers (22 categories), alcohol consumption (daily or most daily, 3 or 4 times a week, 1 or 2 times a week, 1 to 3 times a week, or never or special occasions only), smoking status (never, former, or current), BMI (continuous), the number of long-term morbidities (0, 1, 2, 3, 4, or  $\geq 5$ ), PD-PRS, genotyping array, and the first 10 principal components of ancestry.
