# Supplementary material
Source: PubMed Central journal article supplement (PMC10012040)
Supplement: jamaneurol-e230183-s002.pdf [file jamaneurol-e230183-s002.pdf]

## Data Sharing Statement

Zheng. Physical Frailty, Genetic Predisposition, and Incident Parkinson Disease. *JAMA Neurol.*  
Published March 13, 2023. doi:10.1001/jamaneurol.2023.0183

### Data

**Data available:** Yes

**Data types:** Deidentified participant data, Data dictionary

**How to access data:** <https://www.ukbiobank.ac.uk/>

**When available:** beginning date: 04-30-2017

### Supporting Documents

**Document types:** None

### Additional Information

**Who can access the data:** Researchers whose proposed use of the data has been approved.

**Types of analyses:** For a specified purpose.

**Mechanisms of data availability:** After approval of a proposal.
